# Supplementary figures and images for: Comparing Neighborhoods of Adults With Serious Mental Illness and of the General Population: Research Implications
Source: Atypon-hosted journal article supplement (doi:10.1176/appi.ps.201200365), 2013-05-17

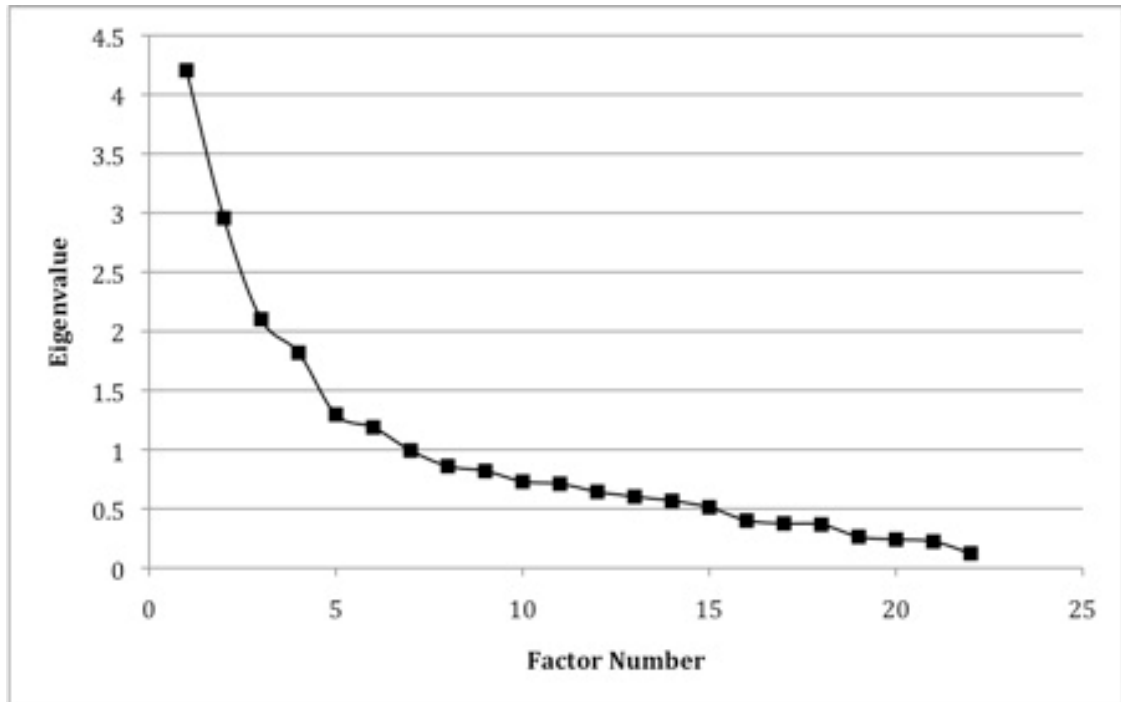

Supplement: 782_ds001.pdf [file 782_ds001.pdf]
